# Supplementary material for: Brain macrophages acquire distinct transcriptomes in multiple sclerosis lesions and normal appearing white matter
Source: PubMed Central journal article supplement (PMC8796391; doi:10.1186/s40478-021-01306-3), 2022-01-28

Supplementary figure S2

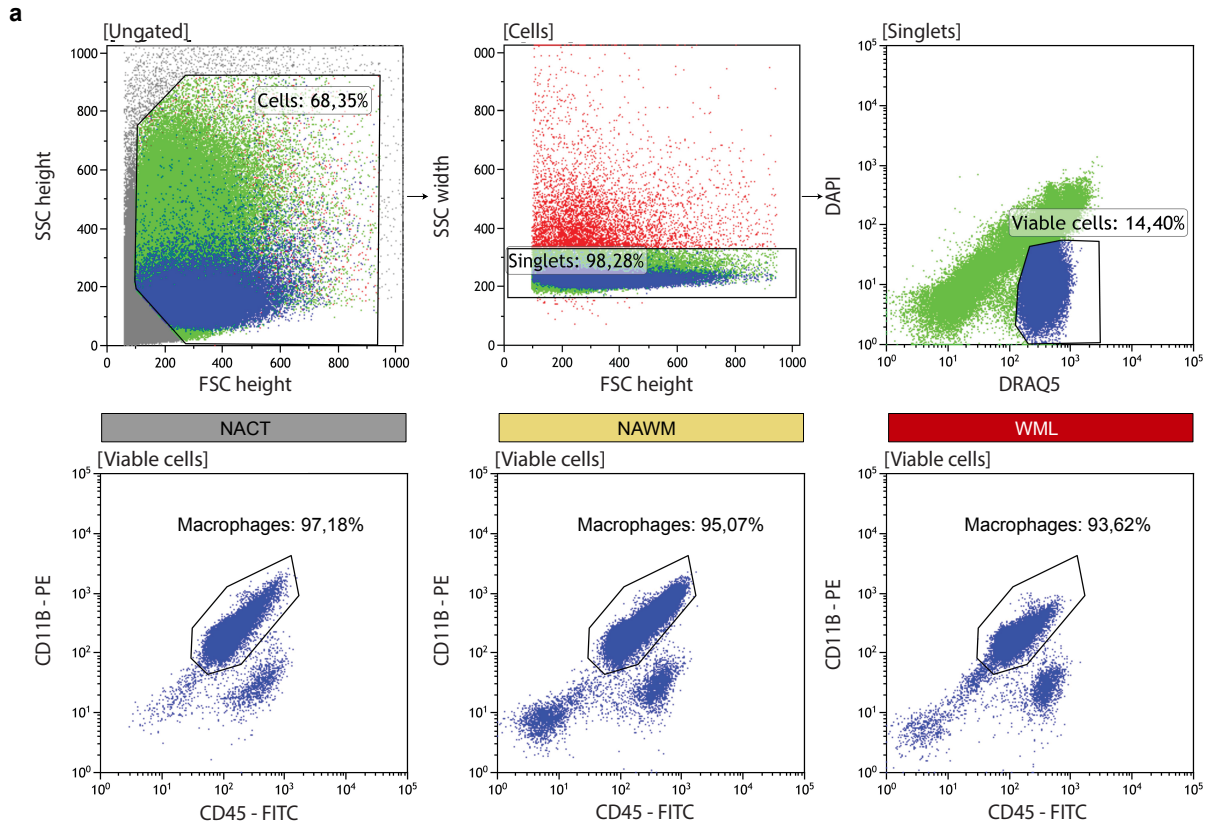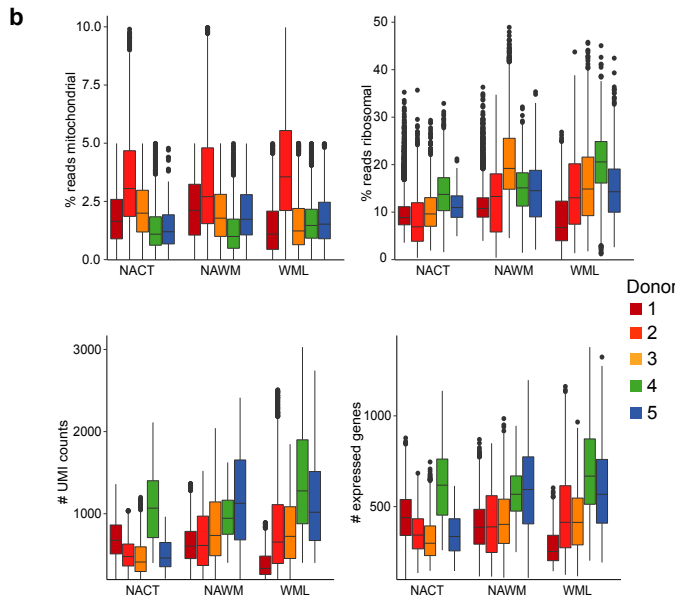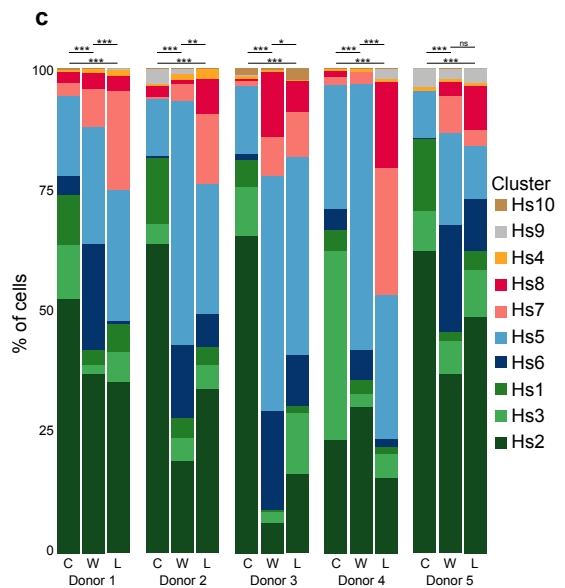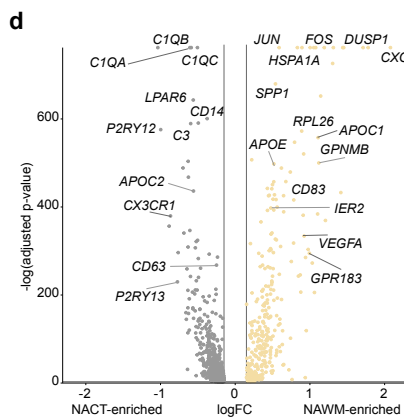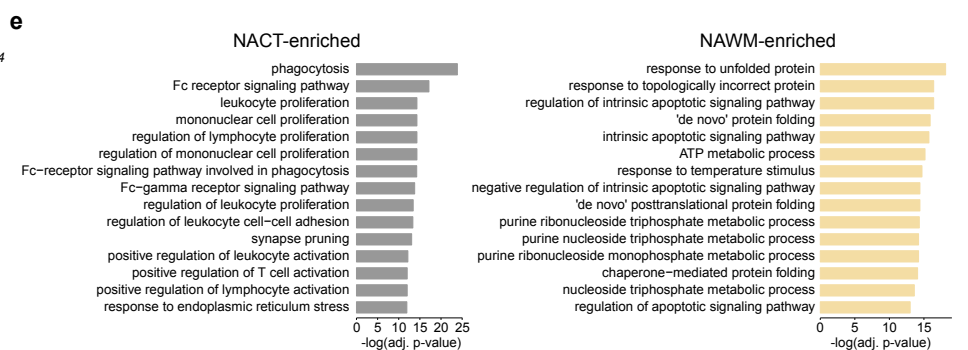

Supplement: 40478_2021_1306_MOESM2_ESM.pdf [file 40478_2021_1306_MOESM2_ESM.pdf]
