# Supplementary material for: Brain macrophages acquire distinct transcriptomes in multiple sclerosis lesions and normal appearing white matter
Source: PubMed Central journal article supplement (PMC8796391; doi:10.1186/s40478-021-01306-3), 2022-01-28

**a**

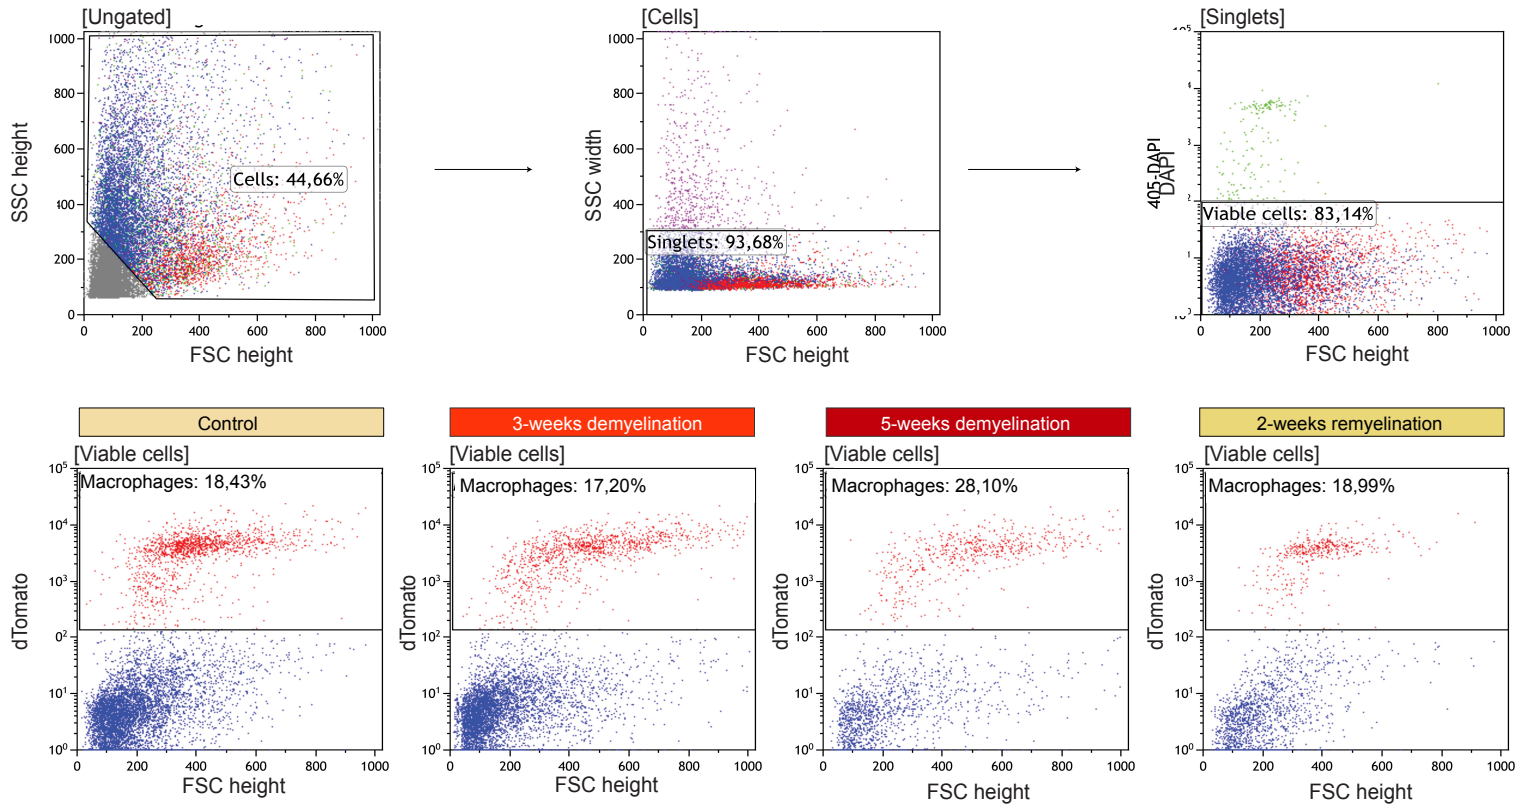

**b**

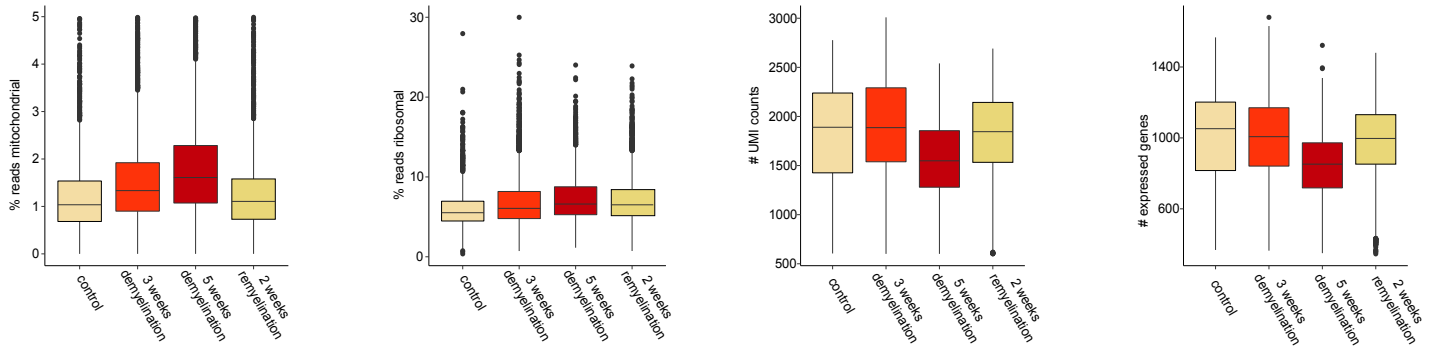

**c**

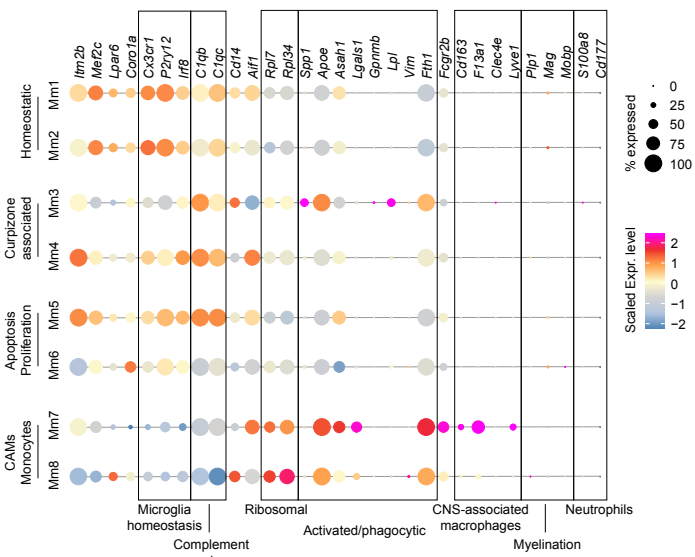

**d**

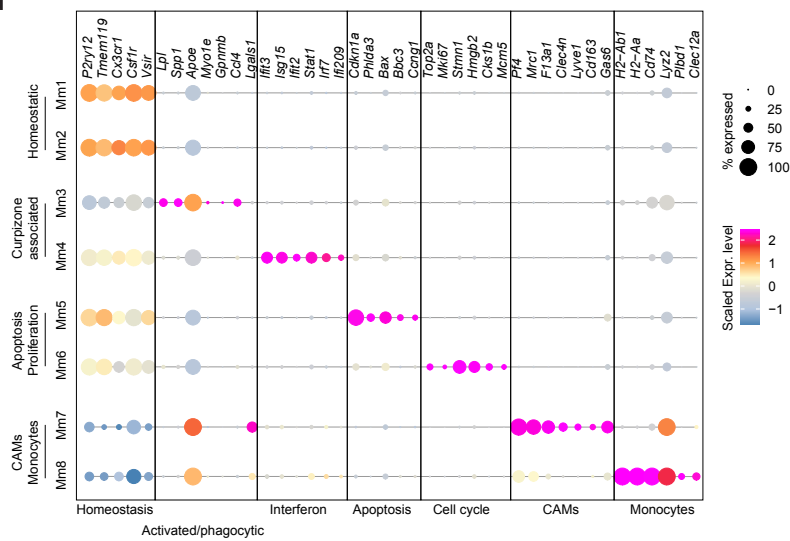

Supplement: 40478_2021_1306_MOESM3_ESM.pdf [file 40478_2021_1306_MOESM3_ESM.pdf]
